# Supplementary material
Source: MDPI journal article supplement (https://www.mdpi.com/2073-4395/9/6/321)
Supplement: s1 [file s1]

# Supplemental Material for “Grape rootstock response to salinity, water and combined salinity and water stresses”

This supplemental section contains seven figures.

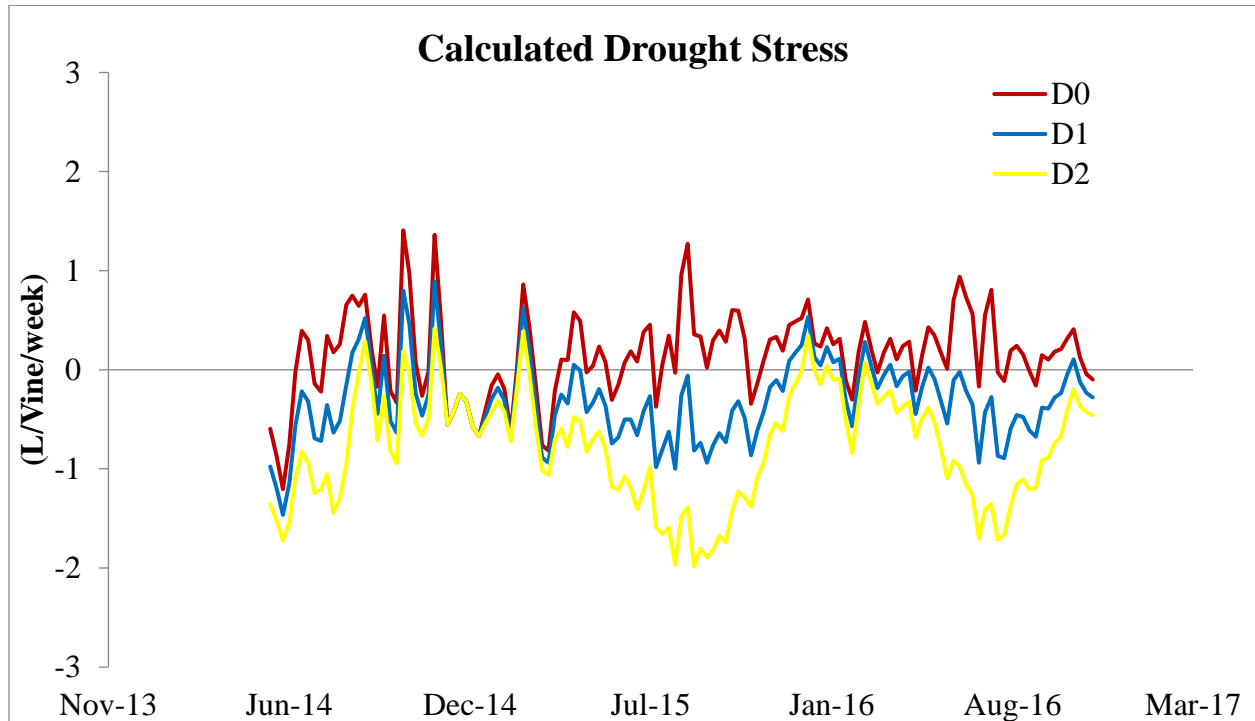

Figure S1. Estimated water deficit for D0 (100%), D1 (80%) and D2 (60%) treatments based on calculation of  $ET_c$  for non-stressed conditions.

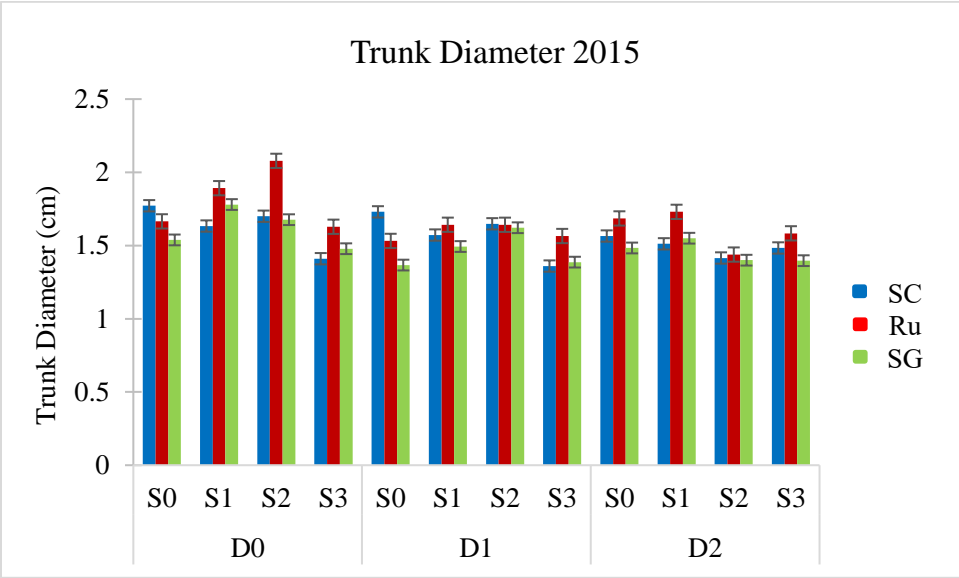

Figure S2. Mean trunk diameter as related to salinity, water application and rootstock, 2015.

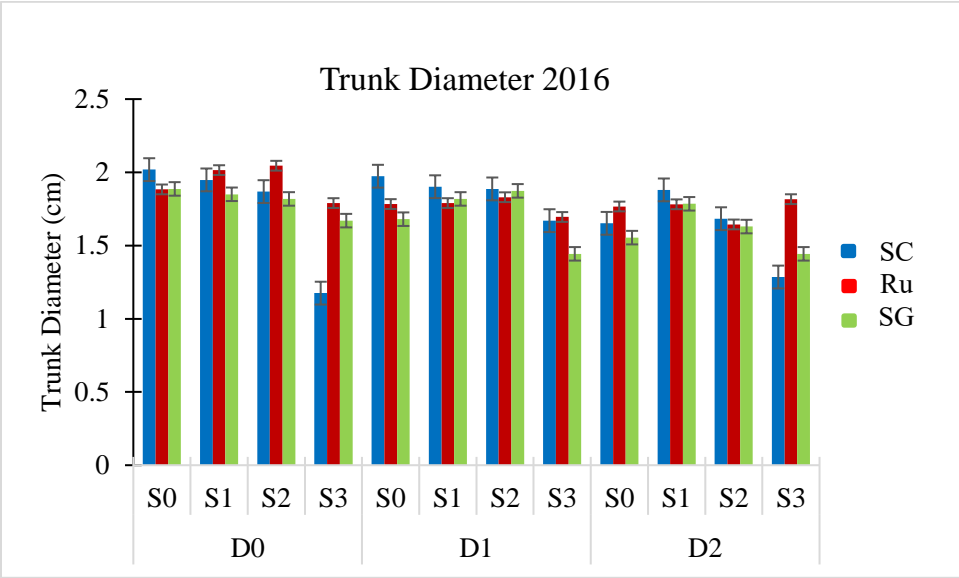

Figure S3. Mean trunk diameter as related to salinity, water application and rootstock, 2016.

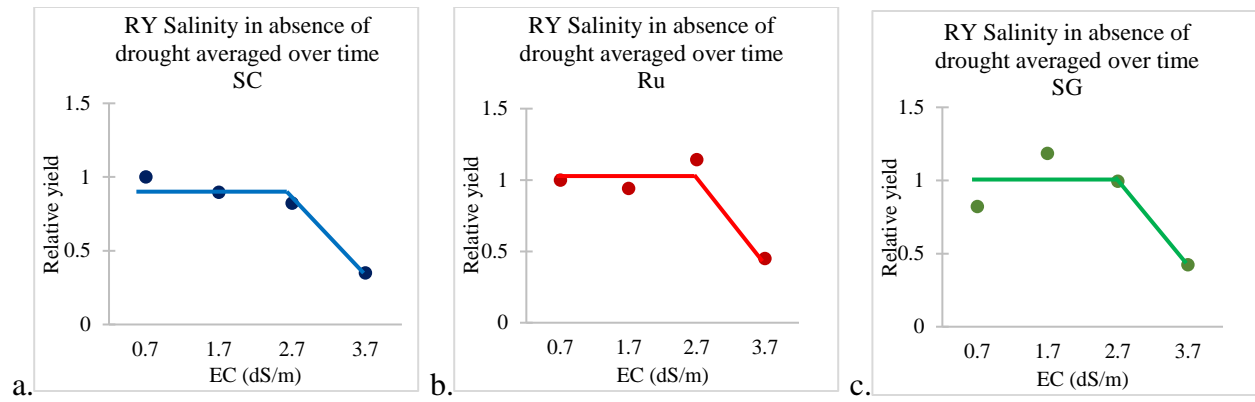

**Figure S4.** Relative yield relationships as related to salt stress in the absence of water stress for a) SC, b) Ru and c) SG rootstocks.

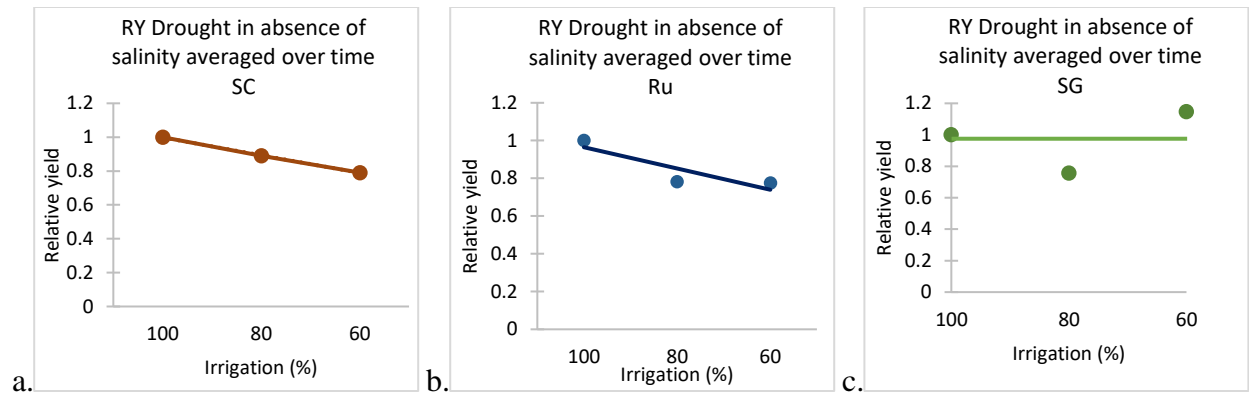

**Figure S5.** Relative yield relationships as related to water stress in the absence of salinity for a) SC, b), Ru and c) SG rootstocks.

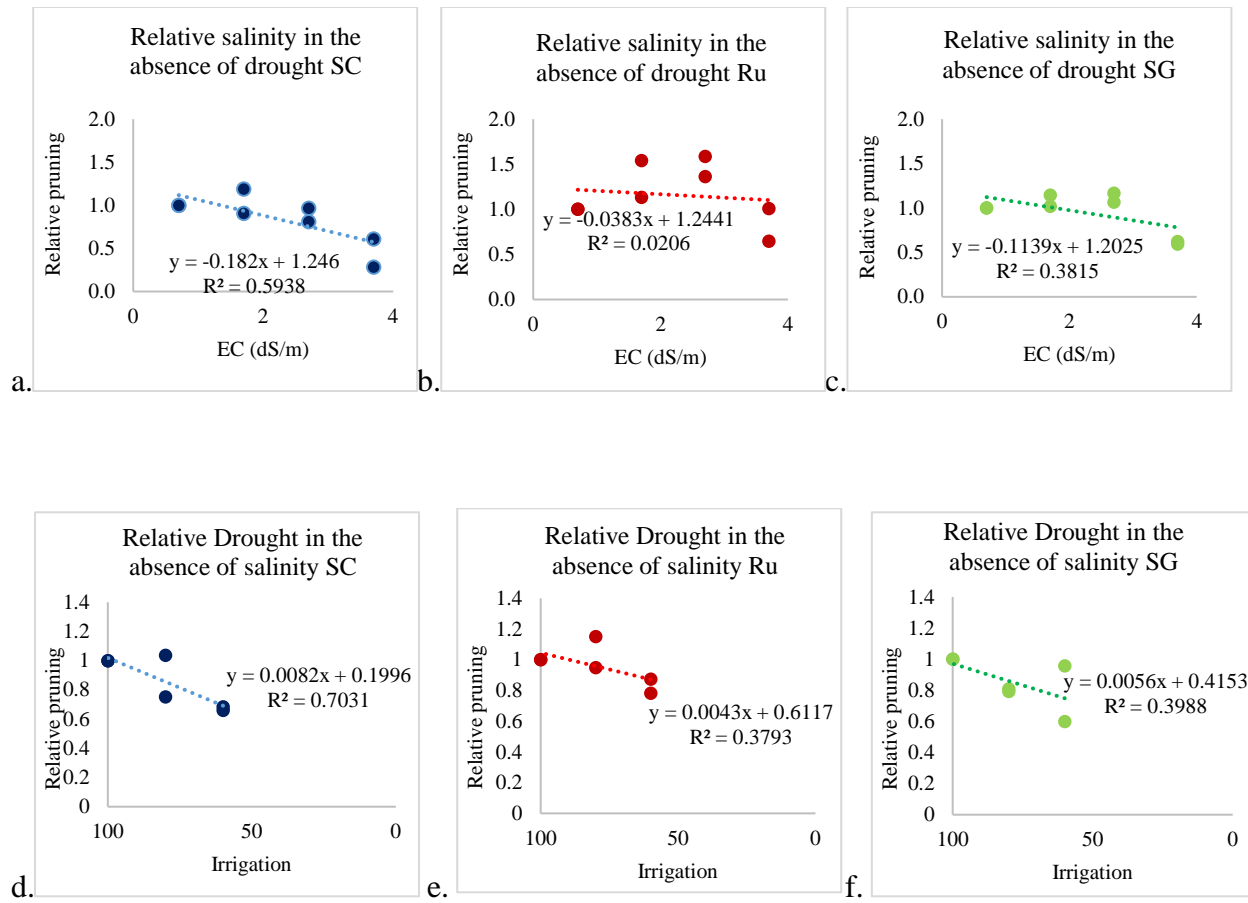

Figure S6. Relative response of pruning weights for a) SC, b) Ru, c) SG rootstock to salinity in the absence of drought stress and d) SC, e) Ru, and f) SG rootstock to water stress in the absence of salt stress.

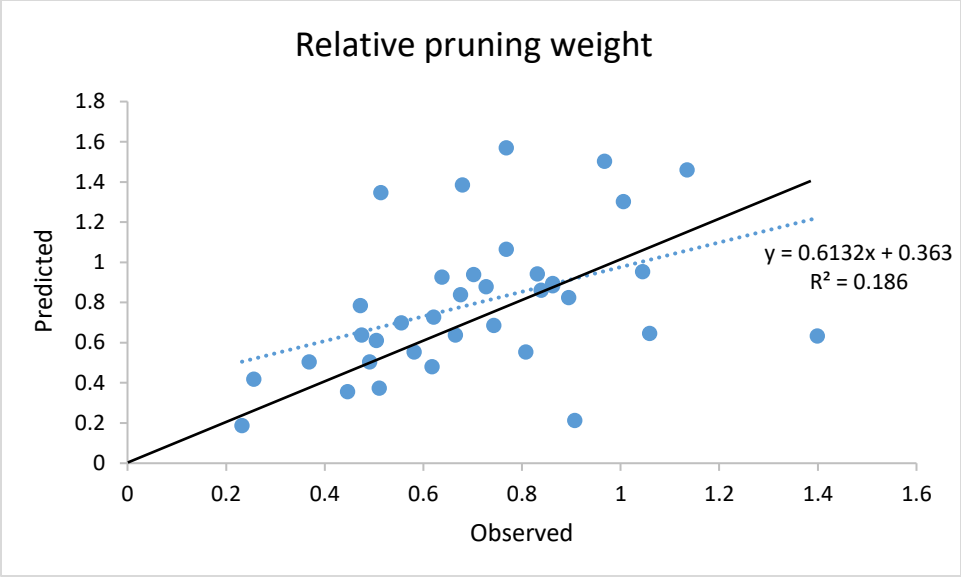

Figure S7. Comparison of predicted and observed relative pruning weight of all rootstocks under combined salt and water stress, using the individual relationships determined in Fig. S6 for salt only and water only stress.
